# Supplementary material
Source: PubMed Central journal article supplement (PMC3675972)
Supplement: CVI.00042-13_zcd999094751so1.pdf [file CVI.00042-13_zcd999094751so1.pdf]

## SUPPLEMENTAL MATERIAL

**Table S1:** Primers and probes used in real-time PCR assays for detection of rs1801274 (FCγRII- A484G (His131Arg)), rs1800896 (IL-10-A1082G), rs1800871 (IL-10-C819T), rs1800872 (IL10 - C627A), rs2243250 (IL-4-C589T), rs5030737, rs1800450, rs1800451, rs11003125, rs7095891, rs7096206 (MBL2-A/O, -H/L, -P/Q, -X/Y), rs5743708 (TLR-2-G2408A), rs4986790 (TLR-4- A12874G), rs4986791 (TLR-4 -C13174T), and rs5743836 (TLR-9-T1237C), rs187084 (TLR-9 – T1486C).

### **FCγRII-A484G (His131Arg)(rs1801274)**

FP 5'-ggAgAAACCATCATgCTgAg

RP 5'-CATACCTTggACAgTgATggTC

5'-gTgggATCCAAACgggAgAA-FL

5'-LC640-TCTgggATTTTCCATTCTggAAgAATgTgACC—PH

### **IL-10**

**-A1082G** (rs1800896)

FP 5'-ATCCAAGACAACACTACTAAggC

RP 5'-ATggggTggAAgAAgTTgAA

5'-ggATAggAggTCCCTTACTTTCTCTTACC-FL

5'-LC640-CCCTACTTCCCCCTCCCAA--PH

**-C819T** (rs1800871)

FP 5'-TCATTCTATgTgCTggAgATgg

RP 5'-TgggggAAgTgggTAAgAgT

5'-ggTgATgTAACATCTCTgTgCCTC-FL

5'-LC640-TTTgCTCACTATAAAATAgAgACggTAagg—PH

**-C627A** (rs1800872)

FP 5'-gCTgAAgAggTggAAACA

RP 5'-gTCTCTgggCCTTAgT

5'-CCTggAACACATCCTgTgACCC-FL

5'-LC705-CCTgTCCTgTAggAAgCCAg--PH

**IL-4-C589T (rs2243250)**

FP 5'- CCAAgggCTTCCTTATg

RP 5'-ggCTTCTTCCAAGTACA

5'- gAACATTgTCCCCAgTgC-FL

5'-LC640—gggTAggAgAgTCTgCCTgT--PH

**MBL2-A/O = EX1**

FP 5'-CATCAACggCTTCCCAggC

RP 5'-TgggCTggCAAgACAACCTATTA

5'-TTCTTCCTTggTgCCATCACgCCCA-FL

5'-LC640—CAGCCCAACACgTACCTggTTCCCCCT--PH

AD (rs5030737)

AB (rs1800450)

AC (rs1800451)

**-H/L** (rs11003125) COMMON PRIMER SET (HL,PQ,XY)

FP 5'-CCTgCCAgAAAgTAgAgAgg

RP 5'-CCTCACCTTggTgTgAgAAA

5'- TTTTAgACAggCTTgCCTgggT-FL

5'-LC640—AgCATTTTCTCTggAAATTTCTTACTACgTTgg--PH

**-P/Q** (rs7095891)

FP 5'-CCTgCCAgAAAgTAgAgAgg

RP 5'-CCTCACCTTggTgTgAgAAA

5'- -CAgAgggCATgCTCggTAA-FL

5'-LC640—ATgTgTTCATTACTgAgATTAACCTTCCCTgAg--PH

**-X/Y** (rs7096206)

FP 5'-CCTgCCAgAAAgTAgAgAgg

RP 5'-CCTCACCTTggTgTgAgAAA  
5'- TCTCACTgCCACggAAgCAT-FL  
5'-LC705- TTTATAgTCTTCCAgCAgCAACgCCA--PH

**TLR-2-G2408A** (rs5743708)

FP 5'-AgTgAgCgggATgCCTACT  
RP 5'-gACTTTATCgCAgCTCTCAgATTTAC  
5'-CAAgCTgCAgAAgATAATgAACACCAAg-FL  
5'-LC640-CCTACCTggAgTggCCCATggACg--PH

**TLR-4**

**-A12874G** (rs4986790) COMMON PRIMER SET (A12874G, C13174T)

FP 5'-ATTTAAAgAAATTAaggCTTCATAAgCT  
RP 5'-CCAAgAAgTTTgAACTCATggTAA  
5'-CTACTACCTCgATgATATTATTgACTTATT-FL  
5'-LC640-AATTgTTTgACAAATgTTTCTTCATTTTCC—PH

**-C13174T** (rs4986791)

FP 5'-ATTTAAAgAAATTAaggCTTCATAAgCT  
RP 5'-CCAAgAAgTTTgAACTCATggTAA  
5'-CTTgAGTTTCAAaggTTgCTgTTCTCAAAGT-FL  
5'-LC705-ATTTTgggACAACCAgCCTAAAgTAT--PH

**TLR-9**

**-T1237C** (rs5743836) COMMON PRIMER SET (T1237C,T1486C)

FP 5'-TCCCAgCAgCAACAATTCATTA  
RP 5'-CTgCTTgCAgTTgACTgTgT  
5'-ggAgTTTCCAaggCAgAgg-FL

5'-LC705-ACA<sub>g</sub>CACATCCCAAg<sub>g</sub>CCCT—PH

—**T1486C** (rs187084)

FP 5'-TCCCA<sub>g</sub>CA<sub>g</sub>CAACAATTCATTA

RP 5'-CT<sub>g</sub>CTT<sub>g</sub>CA<sub>g</sub>TT<sub>g</sub>ACT<sub>g</sub>T<sub>g</sub>T

5'-ATCACT<sub>g</sub>CCCTCA<sub>g</sub>AA<sub>g</sub>CT-FL

5'-LC640-ACATTCCA<sub>g</sub>CAggggAATA<sub>g</sub>AC<sub>g</sub>ATA—PH

**Table S2:** Univariate logistic regression models fit to week 4 response ( $\geq 4$ -fold increase) to TLR4-A12874G (unadjusted and adjusted for CD4 percent and HIV RNA group).

| Genotype    | Comparison  | Serogroup | Odds Ratio        | P-value | Adjusted Odds     | P-value |
|-------------|-------------|-----------|-------------------|---------|-------------------|---------|
|             |             |           | (95% CI)          |         | (95% CI)          |         |
| TLR2-G2408A | AAvs. AG/GG | A         | 1.42 (0.66, 3.07) | 0.368   | 1.17 (0.49, 2.77) | 0.728   |
|             |             | C         | 2.73 (1.24, 6.02) | 0.013   | 2.57 (1.11, 5.92) | 0.027   |
|             |             | W         | 1.48 (0.66, 3.35) | 0.343   | 1.14 (0.42, 3.08) | 0.803   |
|             |             | Y         | 2.80 (1.31, 5.95) | 0.008   | 2.62 (1.18, 5.82) | 0.018   |
